# Supplementary material for: Investigating the ID3/SLC22A4 as immune-related signatures in ischemic stroke
Source: publisher site journal article supplement (doi:10.18632/aging.205308), 2023-12-14
Supplement: Supplementary file [file aging-v15i24-205308-supplementary-material-SD1.pdf]

## SUPPLEMENTARY FIGURE

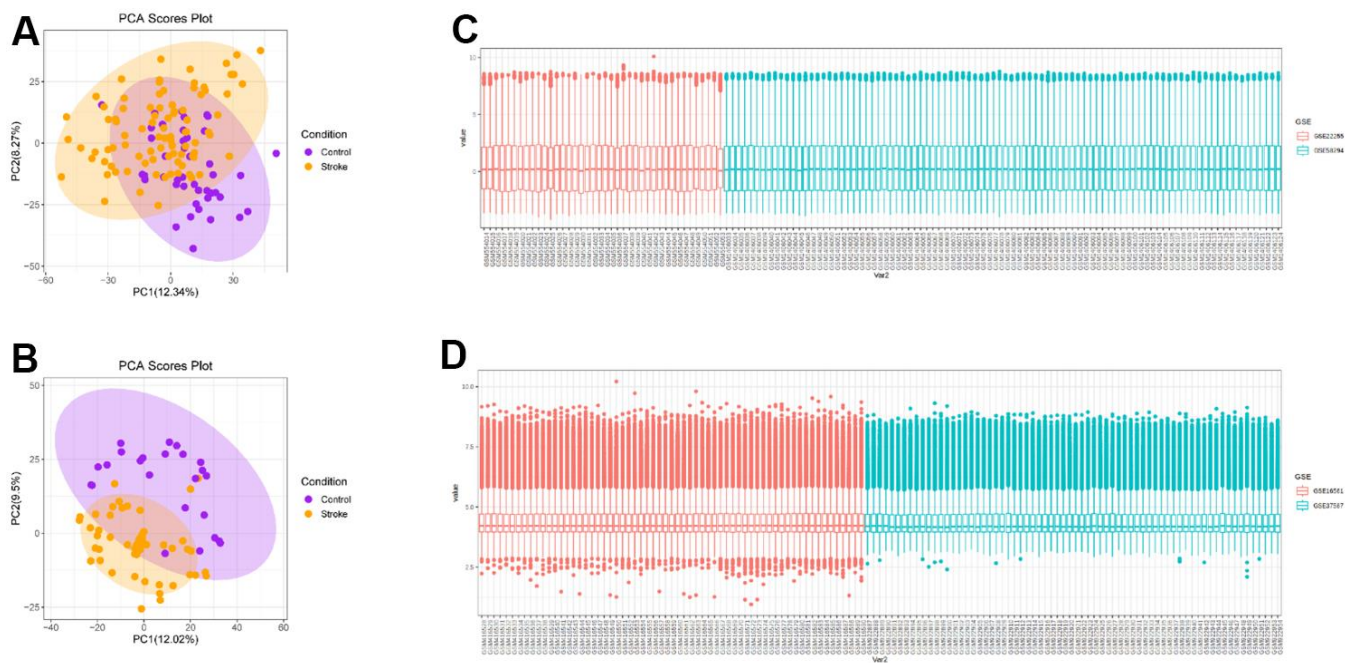

**Supplementary Figure 1. Data preprocessing of DEGs.** (A) PCA after batch correction with ComBat for GSE58294 and GSE22255. (B) PCA after batch correction with ComBat for GSE16561 and GSE37587. (C) Boxplot after batch correction with ComBat for GSE58294 and GSE22255. (D) Boxplot after batch correction with ComBat for GSE16561 and GSE37587.
