# Supplementary material for: Investigating the ID3/SLC22A4 as immune-related signatures in ischemic stroke
Source: publisher site journal article supplement (doi:10.18632/aging.205308), 2023-12-14
Supplement: Supplementary file [file aging-v15i24-205308-supplementary-material-SD2.pdf]

## SUPPLEMENTARY TABLES

**Supplementary Table 1. Sequences of primers.**

| <b>Primer name</b> | <b>Sequence</b>                |
|--------------------|--------------------------------|
| ID3 FP             | 5'-CAGCGTGTTCATAGACTACATCCT-3' |
| ID3 RP             | 5'-TCCTCTTGTCTTGGAGATCAC-3'    |
| SLC22A4 FP         | 5'-GTGTTCCCCTGTGGTGGTTT-3'     |
| SLC22A4 RP         | 5'-TGCTGTTTCATCTTTGCGGCT-3'    |
| GAPDH FP           | 5'-GCAAGTTCAACGGCACAG-3'       |
| GAPDH RP           | 5'-CGCCAGTAGACTCCACGAC-3'      |

**Supplementary Table 2. DElncRNAs of GSE58294 and GSE22255.**

| <b>ID</b> | <b>P-Value</b> | <b>FDR</b>  | <b>log2FC</b> | <b>regulated</b> |
|-----------|----------------|-------------|---------------|------------------|
| LINC00342 | 1.57E-11       | 2.22E-09    | -0.695526303  | Down             |
| LINC00926 | 2.23E-08       | 8.54E-07    | -0.720364083  | Down             |
| LINC00282 | 4.01E-08       | 1.42E-06    | 0.654800644   | Up               |
| LINC01094 | 1.52E-05       | 0.000206152 | 0.628948948   | Up               |
| LINC01270 | 8.44E-05       | 0.000846398 | 0.618386414   | Up               |
| LINC01093 | 0.000382075    | 0.002930149 | 0.791047092   | Up               |

**Supplementary Table 3. The Diana database found that a total of 105 potential miRNAs can bind to the above 6 lncRNAs.**

| <b>Diana_res.Gene.Name</b> | <b>Diana_res.Mirna</b> |
|----------------------------|------------------------|
| LINC00342                  | hsa-let-7a-5p          |
| LINC01094                  | hsa-let-7a-5p          |
| LINC00342                  | hsa-let-7b-5p          |
| LINC01094                  | hsa-let-7b-5p          |
| LINC00342                  | hsa-let-7c-5p          |
| LINC01094                  | hsa-let-7c-5p          |
| LINC00342                  | hsa-let-7d-5p          |
| LINC01094                  | hsa-let-7d-5p          |
| LINC00342                  | hsa-let-7e-5p          |
| LINC01094                  | hsa-let-7e-5p          |
| LINC00342                  | hsa-let-7f-5p          |
| LINC01094                  | hsa-let-7f-5p          |
| LINC00342                  | hsa-let-7g-5p          |
| LINC01094                  | hsa-let-7g-5p          |
| LINC00342                  | hsa-let-7i-5p          |
| LINC01094                  | hsa-let-7i-5p          |
| LINC01094                  | hsa-miR-101-3p         |
| LINC00342                  | hsa-miR-103a-3p        |
| LINC00926                  | hsa-miR-106a-5p        |
| LINC01094                  | hsa-miR-107            |
| LINC00342                  | hsa-miR-10a-5p         |
| LINC01094                  | hsa-miR-125a-5p        |
| LINC00342                  | hsa-miR-1260b          |
| LINC00926                  | hsa-miR-128-1-5p       |
| LINC00342                  | hsa-miR-1285-3p        |
| LINC00926                  | hsa-miR-1293           |
| LINC01094                  | hsa-miR-132-3p         |
| LINC01094                  | hsa-miR-135a-5p        |
| LINC00342                  | hsa-miR-139-5p         |
| LINC01094                  | hsa-miR-139-5p         |
| LINC01270                  | hsa-miR-147b-3p        |
| LINC01094                  | hsa-miR-148b-3p        |
| LINC00342                  | hsa-miR-149-5p         |
| LINC01094                  | hsa-miR-15b-5p         |
| LINC01093                  | hsa-miR-16-5p          |
| LINC01094                  | hsa-miR-16-5p          |
| LINC00342                  | hsa-miR-17-5p          |
| LINC01094                  | hsa-miR-17-5p          |
| LINC01094                  | hsa-miR-181a-5p        |
| LINC00342                  | hsa-miR-188-5p         |
| LINC00342                  | hsa-miR-191-5p         |
| LINC01093                  | hsa-miR-195-5p         |
| LINC01094                  | hsa-miR-195-5p         |
| LINC00342                  | hsa-miR-196a-5p        |
| LINC00342                  | hsa-miR-197-5p         |
| LINC00342                  | hsa-miR-19a-3p         |
| LINC01094                  | hsa-miR-19a-3p         |
| LINC00342                  | hsa-miR-19b-1-5p       |
| LINC00342                  | hsa-miR-19b-3p         |
| LINC01094                  | hsa-miR-19b-3p         |
| LINC00342                  | hsa-miR-20b-5p         |
| LINC01094                  | hsa-miR-20b-5p         |
| LINC00342                  | hsa-miR-210-3p         |
| LINC01094                  | hsa-miR-210-3p         |

|           |                   |
|-----------|-------------------|
| LINC01270 | hsa-miR-210-3p    |
| LINC00342 | hsa-miR-218-5p    |
| LINC01094 | hsa-miR-218-5p    |
| LINC01094 | hsa-miR-219a-2-3p |
| LINC00342 | hsa-miR-221-3p    |
| LINC00342 | hsa-miR-23a-3p    |
| LINC01094 | hsa-miR-23a-3p    |
| LINC01094 | hsa-miR-23b-3p    |
| LINC00342 | hsa-miR-24-3p     |
| LINC01094 | hsa-miR-24-3p     |
| LINC00342 | hsa-miR-25-3p     |
| LINC00342 | hsa-miR-26a-5p    |
| LINC01094 | hsa-miR-26a-5p    |
| LINC00342 | hsa-miR-27a-3p    |
| LINC00342 | hsa-miR-27b-3p    |
| LINC00342 | hsa-miR-296-3p    |
| LINC01094 | hsa-miR-29a-3p    |
| LINC01094 | hsa-miR-29b-3p    |
| LINC01094 | hsa-miR-29c-3p    |
| LINC00342 | hsa-miR-30a-3p    |
| LINC01270 | hsa-miR-30a-5p    |
| LINC00926 | hsa-miR-30b-5p    |
| LINC01094 | hsa-miR-30b-5p    |
| LINC01270 | hsa-miR-30c-2-3p  |
| LINC00926 | hsa-miR-30c-5p    |
| LINC01094 | hsa-miR-30c-5p    |
| LINC00342 | hsa-miR-30e-3p    |
| LINC01094 | hsa-miR-320a-3p   |
| LINC01094 | hsa-miR-33a-5p    |
| LINC01094 | hsa-miR-33b-5p    |
| LINC01094 | hsa-miR-342-3p    |
| LINC00342 | hsa-miR-34a-5p    |
| LINC01094 | hsa-miR-34a-5p    |
| LINC01270 | hsa-miR-34a-5p    |
| LINC00342 | hsa-miR-365a-3p   |
| LINC00342 | hsa-miR-365b-3p   |
| LINC01094 | hsa-miR-423-3p    |
| LINC01270 | hsa-miR-423-5p    |
| LINC01094 | hsa-miR-432-5p    |
| LINC01094 | hsa-miR-433-3p    |
| LINC00342 | hsa-miR-449c-5p   |
| LINC00342 | hsa-miR-450b-5p   |
| LINC01270 | hsa-miR-486-3p    |
| LINC00342 | hsa-miR-589-5p    |
| LINC01094 | hsa-miR-7-5p      |
| LINC01094 | hsa-miR-874-5p    |
| LINC00926 | hsa-miR-876-3p    |
| LINC00342 | hsa-miR-92a-3p    |
| LINC00342 | hsa-miR-93-3p     |
| LINC00342 | hsa-miR-98-5p     |
| LINC01094 | hsa-miR-98-5p     |

**Supplementary Table 4. 13 common miRNAs between validation set GSE110993 and predicted miRNAs.**

| <b>ID</b>       | <b>regulated</b> |
|-----------------|------------------|
| hsa-miR-101-3p  | down             |
| hsa-miR-17-5p   | down             |
| hsa-miR-125a-5p | up               |
| hsa-let-7f-5p   | down             |
| hsa-miR-423-3p  | down             |
| hsa-miR-19b-3p  | down             |
| hsa-let-7i-5p   | down             |
| hsa-miR-92a-3p  | down             |
| hsa-miR-19a-3p  | down             |
| hsa-miR-16-5p   | down             |
| hsa-miR-103a-3p | down             |
| hsa-let-7d-5p   | down             |
| hsa-miR-181a-5p | down             |

**Supplementary Table 5. KEGG enrichment pathways of the 12 differentially expressed mRNAs.**

| <b>Term</b> | <b>Description</b>                | <b>Count</b> | <b>Q-value</b>        | <b>Genes</b> |
|-------------|-----------------------------------|--------------|-----------------------|--------------|
| Hsa04657    | IL-17 signaling pathway           | 2            | 3.07x10 <sup>-2</sup> | PTGS2/MMP9   |
| Hsa04668    | TNF signaling pathway             | 2            | 3.25x10 <sup>-2</sup> | PTGS2/MMP9   |
| Hsa05340    | Primary immunodeficiency          | 1            | 6.34x10 <sup>-3</sup> | CD19         |
| Hsa04662    | B cell receptor signaling pathway | 1            | 6.34x10 <sup>-3</sup> | CD19         |
| Hsa04350    | TGF-beta signaling pathway        | 1            | 6.34x10 <sup>-3</sup> | ID3          |

**Supplementary Table 6. GO biological processes of the 12 differentially expressed mRNAs.**

| <b>Term</b> | <b>Description</b>                                                                        | <b>Count</b> | <b>Q-value</b>        | <b>Genes</b>     |
|-------------|-------------------------------------------------------------------------------------------|--------------|-----------------------|------------------|
| GO:0043154  | Negative regulation of cysteine-type endopeptidase activity involved in apoptotic process | 3            | 3.00x10 <sup>-4</sup> | THBS1/PTGS2/MMP9 |
| GO:0043281  | Regulation of cysteine-type endopeptidase activity involved in apoptotic process          | 3            | 1.26x10 <sup>-3</sup> | THBS1/PTGS2/MMP9 |
| GO:2001234  | Negative regulation of apoptotic signaling pathway                                        | 3            | 1.38x10 <sup>-3</sup> | THBS1/PTGS2/MMP9 |
| GO:0150077  | Regulation of neuroinflammatory response                                                  | 2            | 1.52x10 <sup>-3</sup> | PTGS2/MMP9       |
| GO:1905039  | Carboxylic acid transmembrane transport                                                   | 2            | 8.53x10 <sup>-3</sup> | THBS1/SLC22A4    |
| GO:0098739  | Import across plasma membrane                                                             | 2            | 1.05x10 <sup>-2</sup> | THBS1/SLC22A4    |
| GO:0002283  | Neutrophil activation involved in immune response                                         | 1            | 1.50x10 <sup>-2</sup> | ANXA3            |
| GO:0043312  | Neutrophil degranulation                                                                  | 1            | 1.47x10 <sup>-2</sup> | ANXA3            |
| GO:0006638  | Neutral lipid metabolic process                                                           | 1            | 3.19x10 <sup>-2</sup> | SLC22A4          |
| GO:0002446  | Neutrophil mediated immunity                                                              | 1            | 1.73x10 <sup>-2</sup> | ANXA3            |
| GO:0051092  | Positive regulation of NF-kappaB transcription factor activity                            | 1            | 3.41x10 <sup>-2</sup> | IL18RAP          |
| GO:0033549  | Regulation of DNA replication                                                             | 1            | 3.35x10 <sup>-2</sup> | ID3              |
| GO:0017017  | B cell differentiation                                                                    | 1            | 3.38x10 <sup>-2</sup> | CD19             |

**Supplementary Table 7. AUC and 95%CI for Support Vector Machines (SVM).**

| Gene    | AUC      | CI_95       |
|---------|----------|-------------|
| PTGS2   | 0.686858 | 0.571-0.799 |
| ID3     | 0.892915 | 0.818-0.954 |
| ITM2C   | 0.837209 | 0.750-0.914 |
| MMP9    | 0.736074 | 0.617-0.839 |
| NELL2   | 0.742023 | 0.625-0.836 |
| SLC22A4 | 0.891293 | 0.818-0.952 |
| THBS1   | 0.772309 | 0.667-0.867 |
| ABCA1   | 0.842618 | 0.749-0.925 |
| ANXA3   | 0.871823 | 0.786-0.943 |
| CD19    | 0.806382 | 0.706-0.895 |
| IL18RAP | 0.835587 | 0.746-0.915 |
| NFIL3   | 0.813413 | 0.724-0.896 |

**Supplementary Table 8. Spearman correlation between immune cell subsets and *ID3*.**

| Gene | Immune cells                 | Spearman coefficient | P-value  | Type     |
|------|------------------------------|----------------------|----------|----------|
| ID3  | T cells CD4 naïve            | 0.298475             | 0.000508 | Positive |
| ID3  | B cells naïve                | 0.294499             | 0.000608 | Positive |
| ID3  | Mast cells activated         | 0.250909             | 0.003709 | Positive |
| ID3  | Plasma cells                 | 0.157024             | 0.072164 | Positive |
| ID3  | Mast cells resting           | 0.147602             | 0.091227 | Positive |
| ID3  | T cells CD8                  | 0.144252             | 0.042889 | Positive |
| ID3  | B cells memory               | 0.098591             | 0.260719 | Positive |
| ID3  | Eosinophils                  | 0.098383             | 0.261728 | Positive |
| ID3  | NK cells activated           | 0.049993             | 0.569167 | Positive |
| ID3  | T cells follicular helper    | 0.042843             | 0.325705 | Positive |
| ID3  | T cells regulatory (Tregs)   | 0.034368             | 0.695634 | Positive |
| ID3  | Macrophages M1               | 0.002334             | 0.978809 | Positive |
| ID3  | Macrophages M2               | -0.024199            | 0.813052 | Negative |
| ID3  | Dendritic cells activated    | -0.024199            | 0.782991 | Negative |
| ID3  | Monocytes                    | -0.040177            | 0.647386 | Negative |
| ID3  | T cells gamma delta          | -0.044457            | 0.615742 | Negative |
| ID3  | NK cells resting             | -0.081861            | 0.350748 | Negative |
| ID3  | Dendritic cells resting      | -0.093088            | 0.288440 | Negative |
| ID3  | T cells CD4 memory activated | -0.145269            | 0.046517 | Negative |
| ID3  | Macrophages M0               | -0.150459            | 0.044066 | Negative |
| ID3  | T cells CD4 memory resting   | -0.205632            | 0.018010 | Negative |
| ID3  | Neutrophils                  | -0.272768            | 0.001554 | Negative |

**Supplementary Table 9. Spearman correlation between immune cell subsets and SLC22A4.**

| <b>Gene</b> | <b>Immune cells</b>          | <b>Spearman coefficient</b> | <b>P-value</b> | <b>Type</b> |
|-------------|------------------------------|-----------------------------|----------------|-------------|
| SLC22A4     | Neutrophils                  | 0.433053                    | 2.15E-07       | Positive    |
| SLC22A4     | Monocytes                    | 0.201701                    | 0.647386       | Positive    |
| SLC22A4     | T cells CD4 memory resting   | 0.187821                    | 0.018010       | Positive    |
| SLC22A4     | T cells regulatory (Tregs)   | 0.125462                    | 0.151738       | Positive    |
| SLC22A4     | Mast cells resting           | 0.147602                    | 0.091227       | Positive    |
| SLC22A4     | Macrophages M0               | 0.090918                    | 0.042778       | Positive    |
| SLC22A4     | Plasma cells                 | 0.061858                    | 0.481046       | Positive    |
| SLC22A4     | Macrophages M1               | 0.054044                    | 0.238245       | Positive    |
| SLC22A4     | Dendritic cells resting      | 0.029643                    | 0.735808       | Positive    |
| SLC22A4     | B cells memory               | 0.029631                    | 0.735908       | Positive    |
| SLC22A4     | T cells CD4 memory activated | 0.027724                    | 0.042336       | Positive    |
| SLC22A4     | NK cells resting             | 0.023939                    | 0.785263       | Positive    |
| SLC22A4     | Dendritic cells activated    | 0.013793                    | 0.875265       | Positive    |
| SLC22A4     | NK cells activated           | -0.001887                   | 0.982866       | Negative    |
| SLC22A4     | T cells follicular helper    | -0.035754                   | 0.684003       | Negative    |
| SLC22A4     | Macrophages M2               | -0.074522                   | 0.395746       | Negative    |
| SLC22A4     | T cells CD4 naïve            | -0.077318                   | 0.022881       | Negative    |
| SLC22A4     | Mast cells resting           | -0.079647                   | 0.363975       | Negative    |
| SLC22A4     | T cells gamma delta          | -0.089833                   | 0.305662       | Negative    |
| SLC22A4     | Eosinophils                  | -0.144841                   | 0.097515       | Negative    |
| SLC22A4     | Mast cells activated         | -0.193911                   | 0.025889       | Negative    |
| SLC22A4     | B cells naïve                | -0.250896                   | 0.003711       | Negative    |
| SLC22A4     | T cells CD8                  | -0.353914                   | 3.14E-05       | Negative    |
